# Supplementary material for: The Role of Metabolites in the Link between DNA Replication and Central Carbon Metabolism in Escherichia coli
Source: MDPI journal article supplement (doi:10.3390/genes11040447), 2020-04-19

Figure S1

The kinetics of DNA replication in vivo in the presence of CCM metabolites. The wild type (empty columns) and *dna(ts)* (as indicated, filled columns) bacteria were cultured at the semi-restrictive temperatures in the presence of indicated metabolites at various concentrations. DNA synthesis was assessed by measurement of [<sup>3</sup>H]thymidine incorporation at time-points as indicated. The results are from at least three repetitions of experiments with SD indicated.

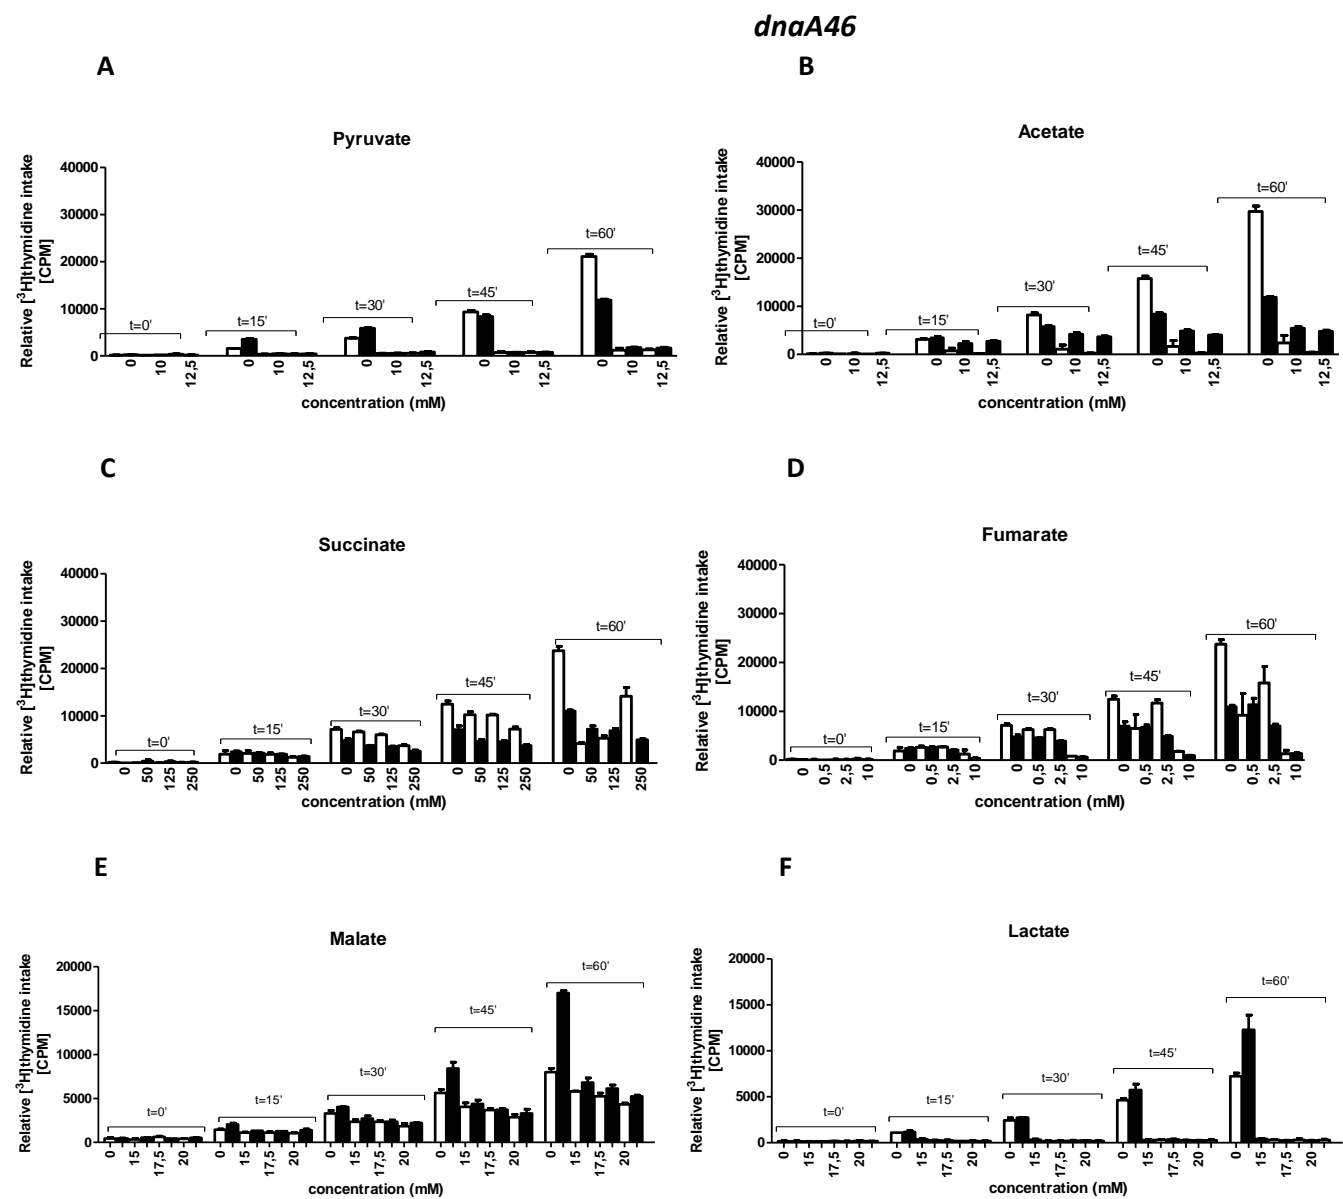

*dnaC(ts)*

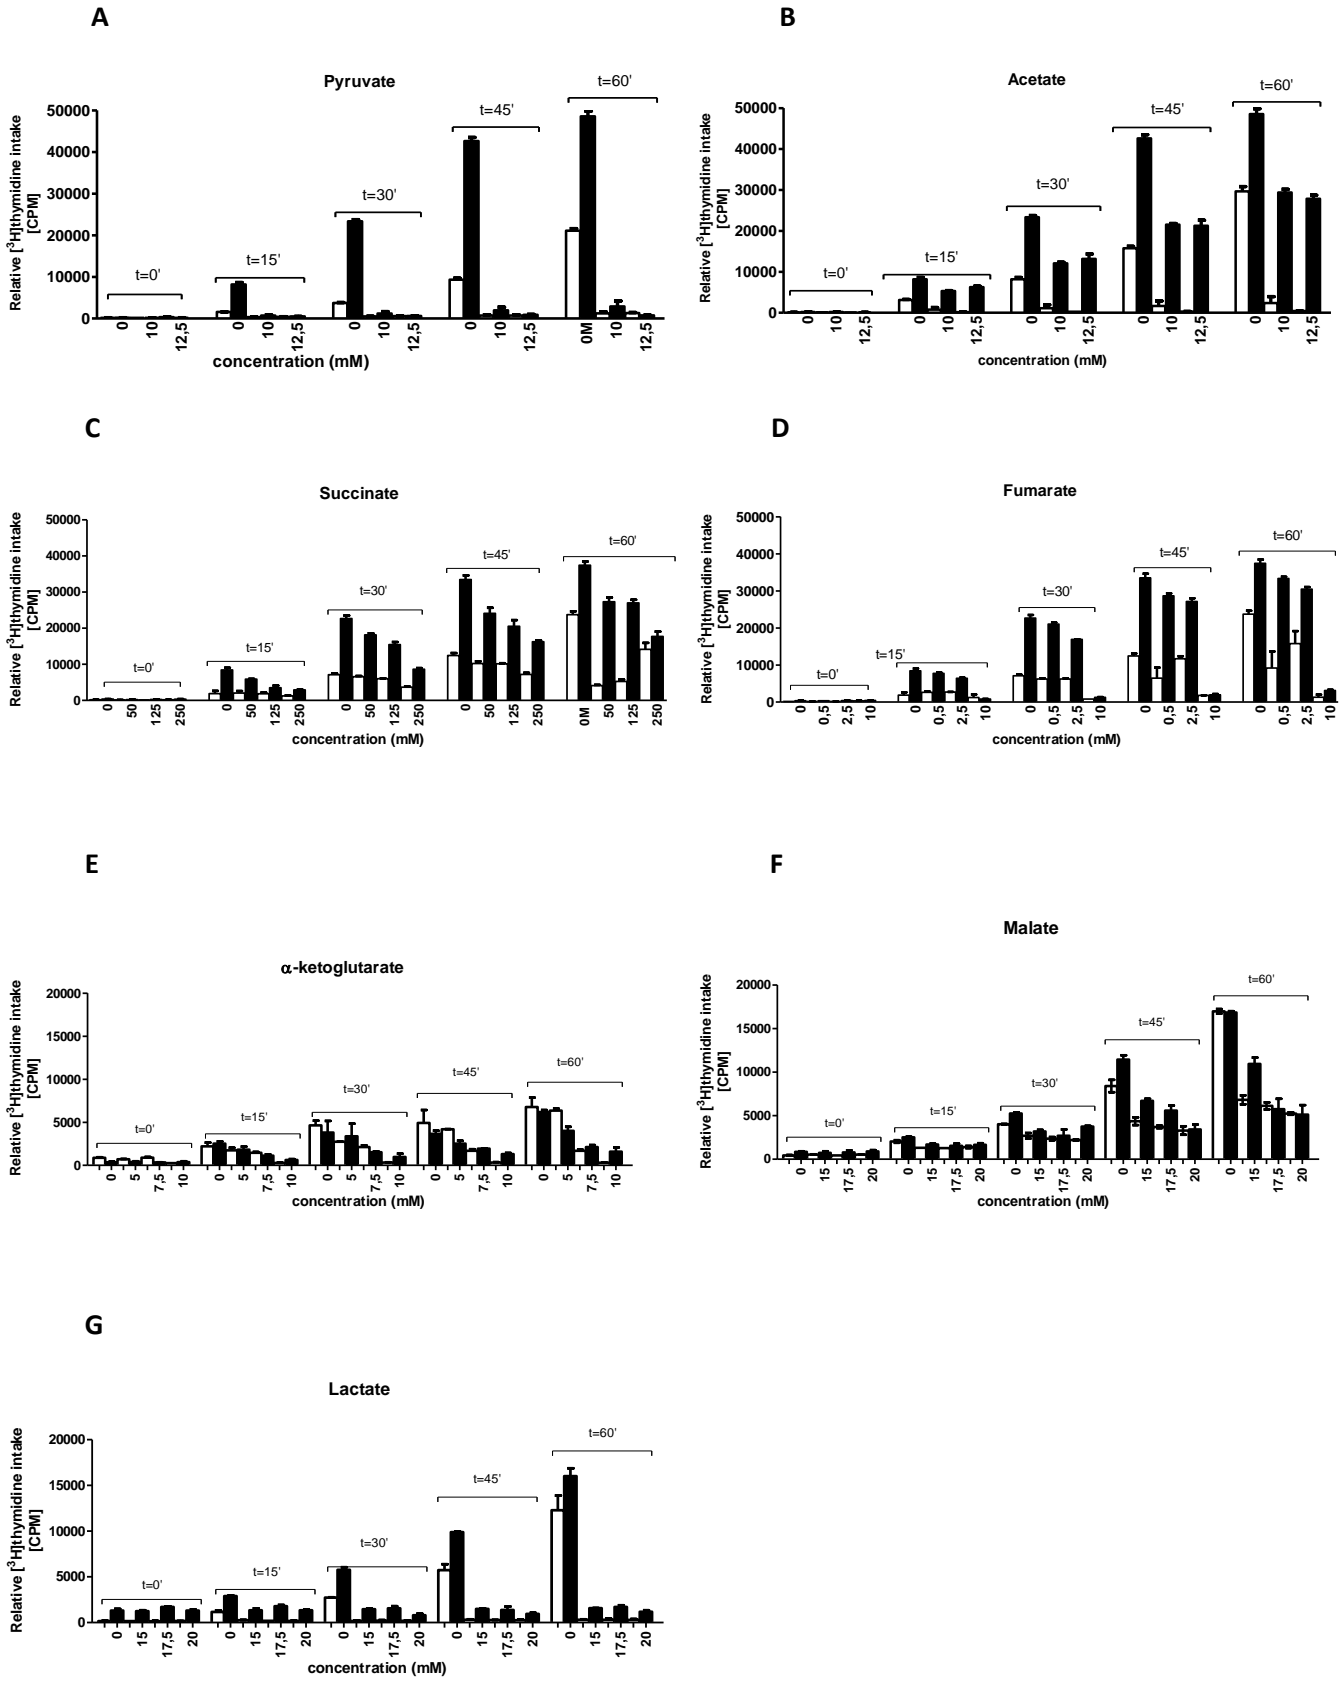

*dnaE486*

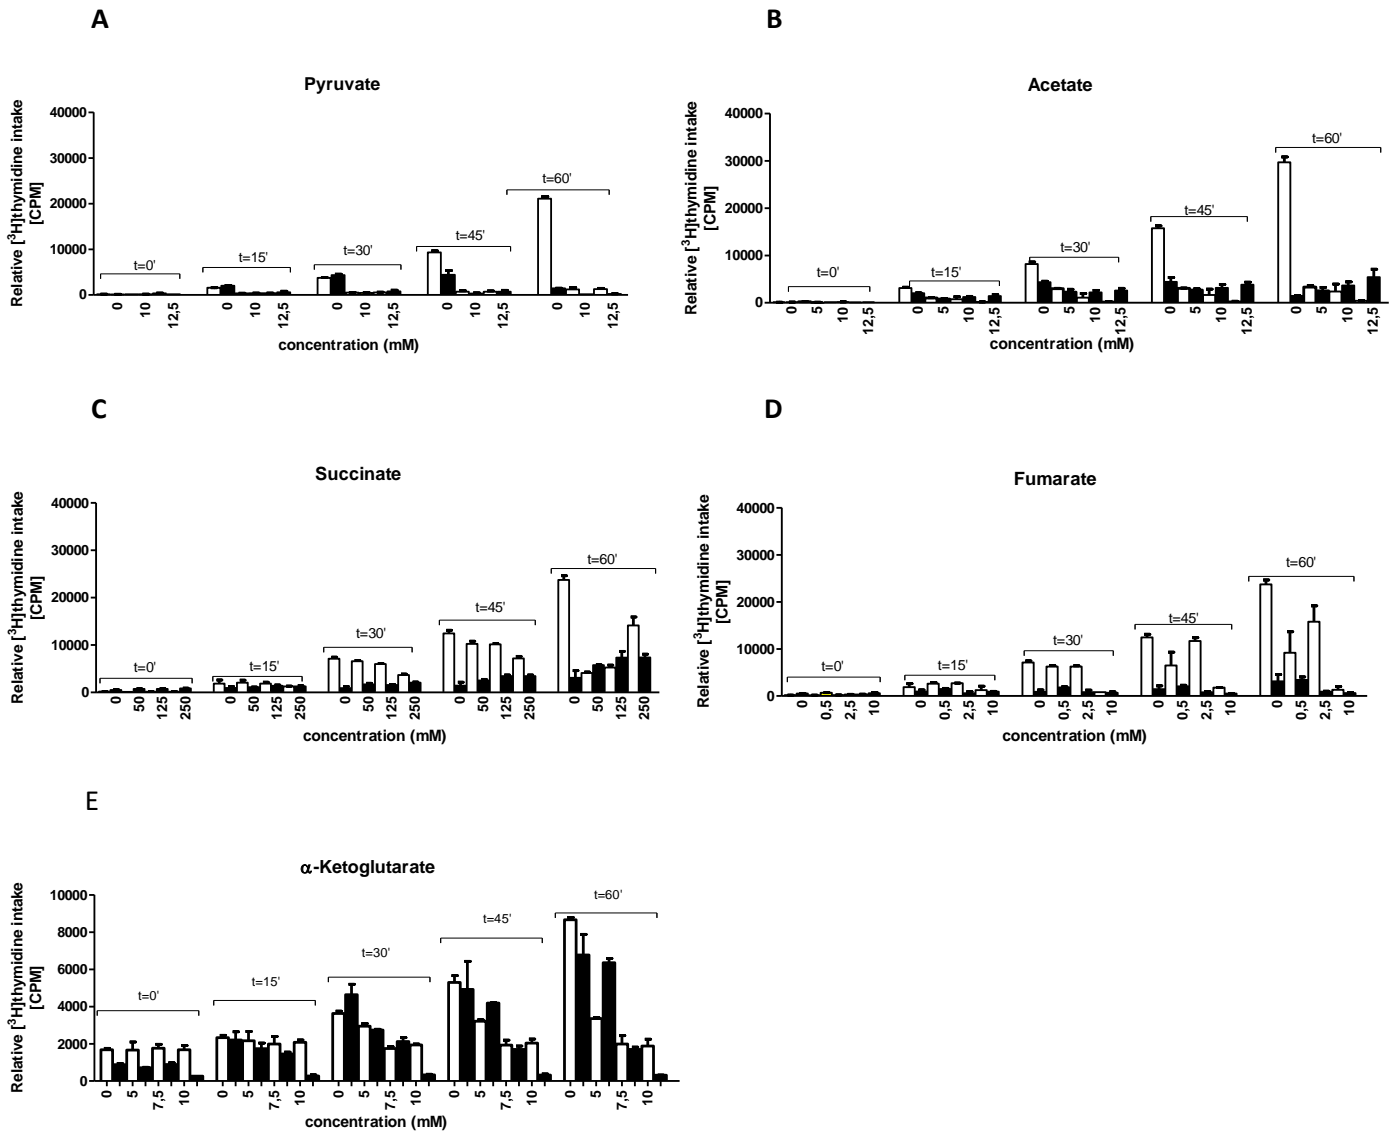

*dnaG(ts)*

A

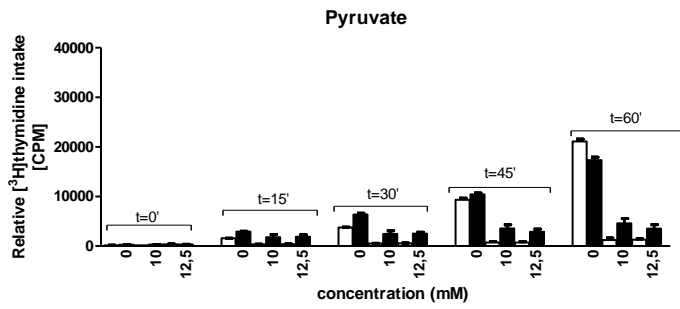

B

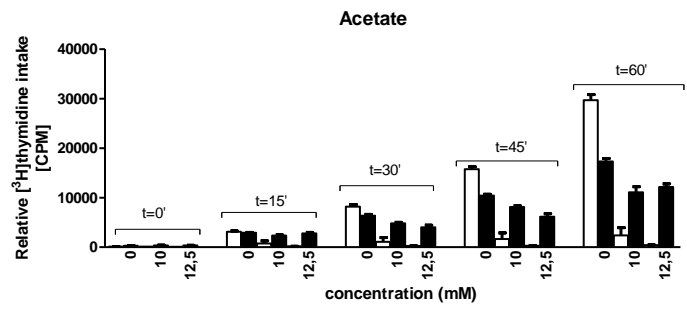

C

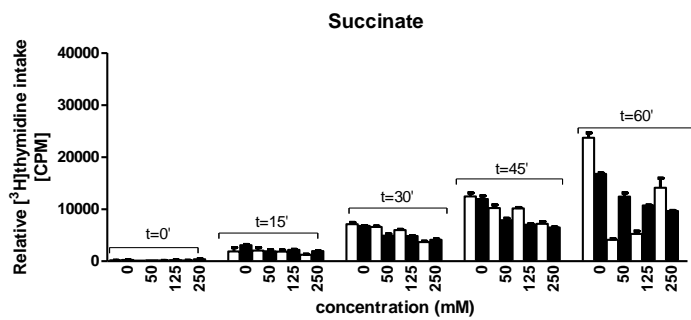

D

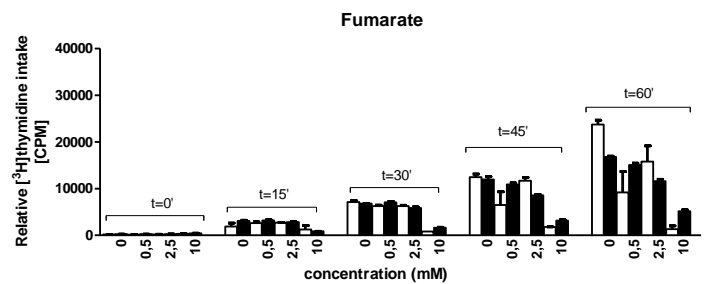

E

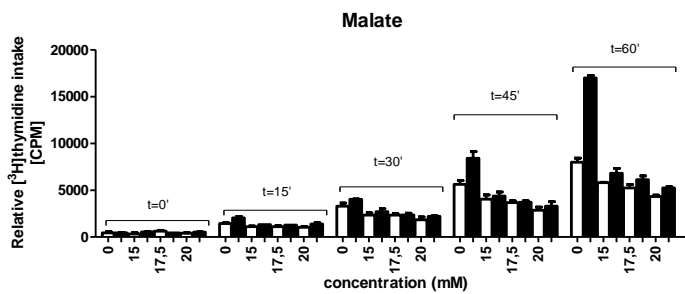

F

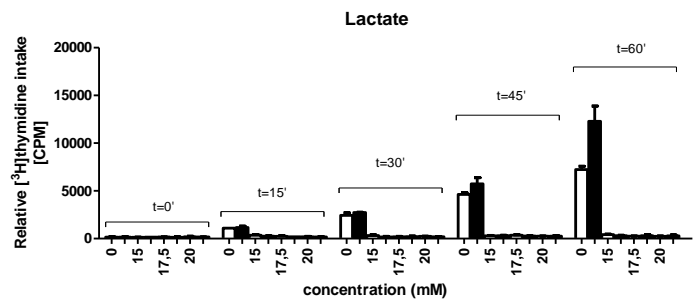

*dnaN159*

**A**

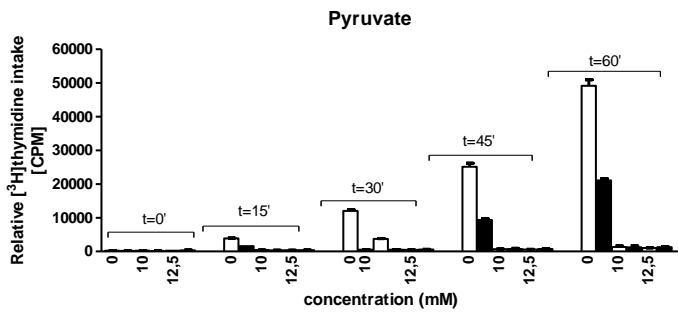

**B**

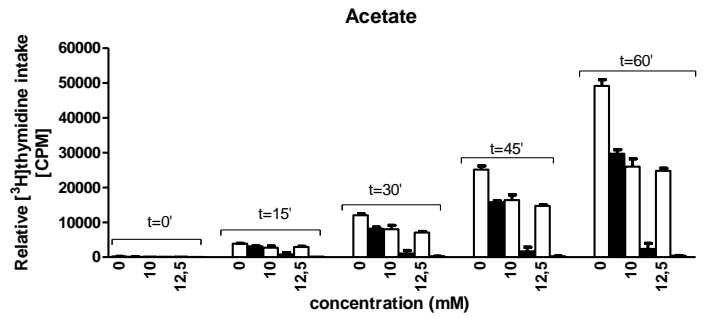

**C**

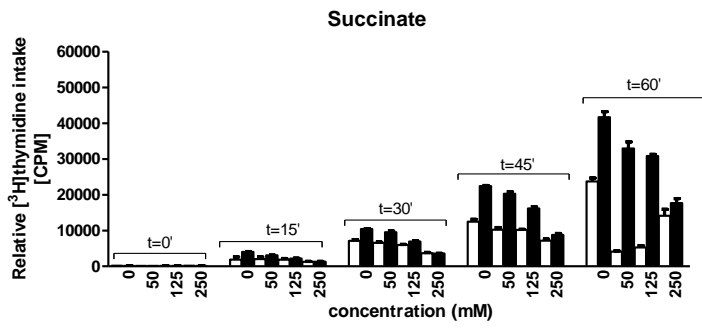

**D**

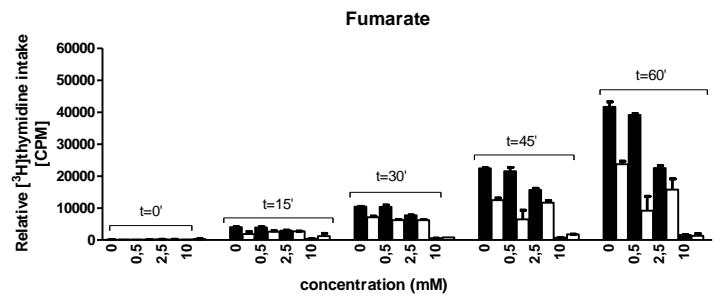

Supplement: s1 [file s1]
